# Supplementary material for: Synthesis of macroscopic monolithic metal–organic gels for ultra-fast destruction of chemical warfare agents
Source: PubMed Central journal article supplement — RSC Adv. 2021 Jun 23;11(36):22125–30. doi: 10.1039/d1ra01703a (PMC9034225; doi:10.1039/d1ra01703a), 2021-06-23
Supplement: RA-011-D1RA01703A-s001.pdf [file RA-011-D1RA01703A-s001.pdf]

## Supporting Information

### Synthesis of macroscopic monolithic metal-organic gels for ultra-fast destruction of chemical warfare agents

Chuan Zhou<sup>a,b</sup>, Shouxin Zhang<sup>a,b</sup>, Hongjie Pan<sup>b</sup>, Guang Yang<sup>b</sup>, Lingyun Wang<sup>b</sup>, Cheng-an Tao<sup>c</sup>, Heguo Li<sup>b,\*</sup>

<sup>a</sup>State Key Laboratory of NBC Protection for Civilian, Beijing 102205, PR China

<sup>b</sup>Research Institute of Chemical Defense, Beijing 102205, PR China

<sup>c</sup>College of Liberal Arts and Science, National University of Defense Technology, Changsha 410073, China

**Table S1** Synthesis conditions and porosity data for UiO-66 xerogel.

| # | Sample   | BDC:ZrOCl <sub>2</sub> | Washing procedure      | Centrifugation procedure | Drying temperature | S <sub>BET</sub> m <sup>2</sup> g <sup>-1</sup> | W <sub>o</sub> cm <sup>3</sup> g <sup>-1</sup> | V <sub>tot</sub> cm <sup>3</sup> g <sup>-1</sup> |
|---|----------|------------------------|------------------------|--------------------------|--------------------|-------------------------------------------------|------------------------------------------------|--------------------------------------------------|
| 1 | UiO-66-A | 7.25:5                 | DMF<br>(1 x 40 ml)     | 3000 rpm<br>(1 x 10 min) | 30°C               | 1042                                            | 0.26                                           | 0.90                                             |
| 2 | UiO-66-B | 7.25:5                 | DMF<br>(1 x 40 ml)     | 3000 rpm<br>(1 x 10 min) | 50°C               | 1207                                            | 0.30                                           | 1.02                                             |
| 3 | UiO-66-C | 7.25:5                 | DMF<br>(1 x 40 ml)     | 3000 rpm<br>(1 x 10 min) | 70°C               | 1406                                            | 0.36                                           | 1.30                                             |
| 4 | UiO-66-D | 7.25:5                 | DMF<br>(3 x 40 ml)     | 3000 rpm<br>(3 x 10 min) | 30°C               | 1010                                            | 0.27                                           | 1.20                                             |
| 5 | UiO-66-E | 7.25:5                 | Ethanol<br>(1 x 40 ml) | 3000 rpm<br>(1 x 10 min) | 30°C               | 1274                                            | 0.33                                           | 0.80                                             |
| 6 | UiO-66-F | 7.25:5                 | Ethanol<br>(3 x 40 ml) | 3000 rpm<br>(3 x 10 min) | 30°C               | 1578                                            | 0.40                                           | 1.98                                             |
| 7 | UiO-66-G | 7.25:5                 | DMF<br>(1 x 40 ml)     | 3000 rpm<br>(1 x 60 min) | 30°C               | 1008                                            | 0.25                                           | 0.91                                             |
| 8 | UiO-66-H | 5:5                    | DMF<br>(1 x 40 ml)     | 3000 rpm<br>(1 x 10 min) | 30°C               | 1474                                            | 0.38                                           | 1.34                                             |
| 9 | UiO-66-I | 5:7.25                 | DMF<br>(1 x 40 ml)     | 3000 rpm<br>(1 x 10 min) | 30°C               | 1546                                            | 0.40                                           | 1.08                                             |

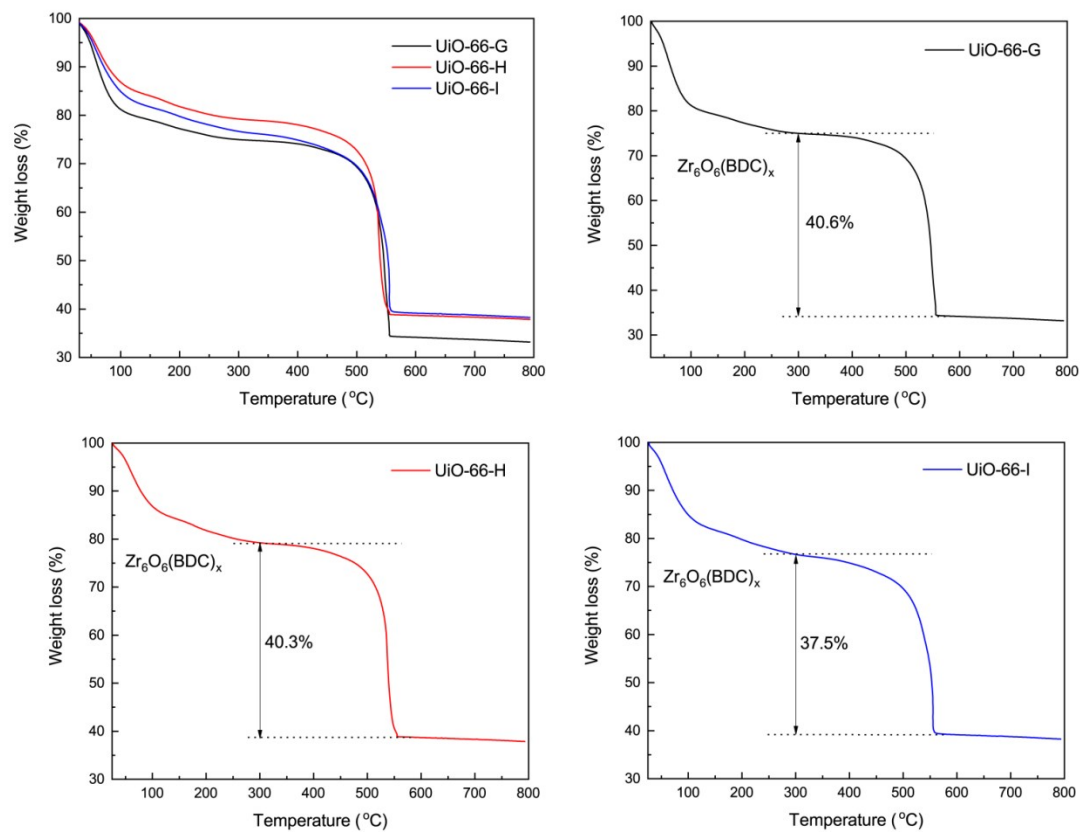

**Fig. S1** TGA curves of UiO-66 xerogels with different metal-to-ligand ratios.

**Table S2** Elemental analysis of UiO-66 and UiO-66-NH<sub>2</sub> xerogel.

|           | Composition (%) |                |             |                                |
|-----------|-----------------|----------------|-------------|--------------------------------|
|           | Theoretical     | UiO-66 xerogel | Theoretical | UiO-66-NH <sub>2</sub> xerogel |
| Zirconium | 32.9            | 27.0           | 31.2        | 25.5                           |
| Carbon    | 34.6            | 27.7           | 32.9        | 26.6                           |
| Hydrogen  | 1.7             | 3.6            | 2.0         | 3.5                            |
| Nitrogen  | 0.0             | 0              | 4.8         | 3.2                            |

**Table S3** Porosity data for monolithic UiO-66-X xerogels.  $S_{\text{BET}}$  = BET surface area;  $W_0$  = micropore volume;  $V_{\text{tot}}$  = total pore volume.

|                                | $S_{\text{BET}}$<br>( $\text{m}^2 \text{g}^{-1}$ ) | $W_0$<br>( $\text{cm}^3 \text{g}^{-1}$ ) | $V_{\text{tot}}$<br>( $\text{cm}^3 \text{g}^{-1}$ ) |
|--------------------------------|----------------------------------------------------|------------------------------------------|-----------------------------------------------------|
| UiO-66-NH <sub>2</sub> xerogel | 1275                                               | 0.27                                     | 1.45                                                |
| UiO-66 xerogel                 | 1913                                               | 0.44                                     | 2.25                                                |

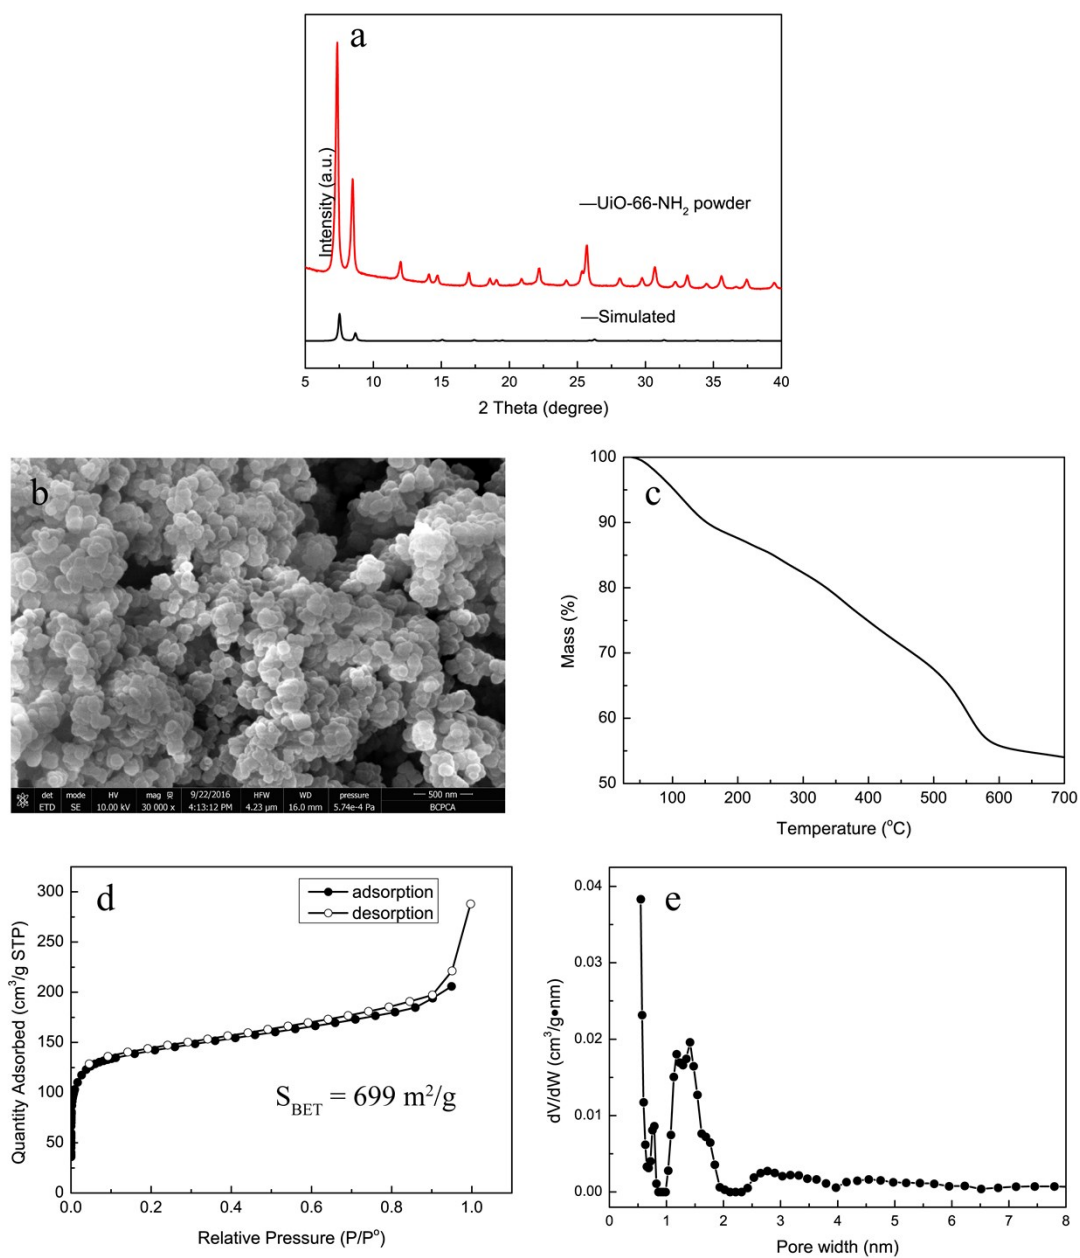

**Fig. S2** Characterization of UiO-66-NH<sub>2</sub> powder. (a) The XRD pattern; (b) SEM image; (c) The TGA curve; (d) N<sub>2</sub> adsorption-desorption isotherm; (e) pore size distributions.
